# Supplementary material for: A Linkage Map and QTL Analysis for Pyrethroid Resistance in the Bed BugCimex lectularius
Source: Oxford University Press journal article supplement (doi:10.1534/g3.116.033092), 2016-10-25

### r1697\_NW\_014465022

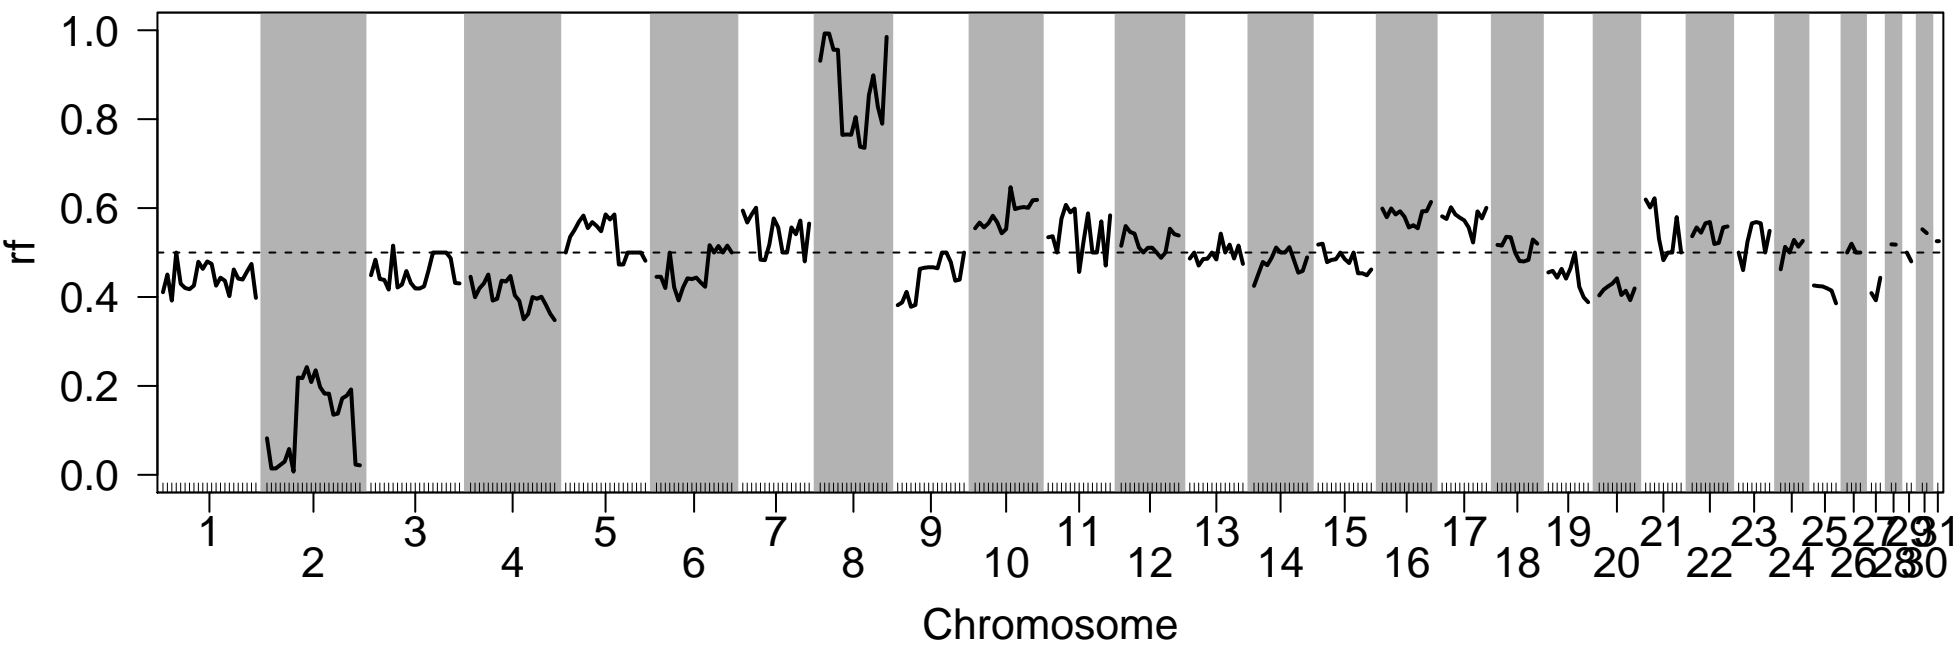

### r1697\_NW\_014465022

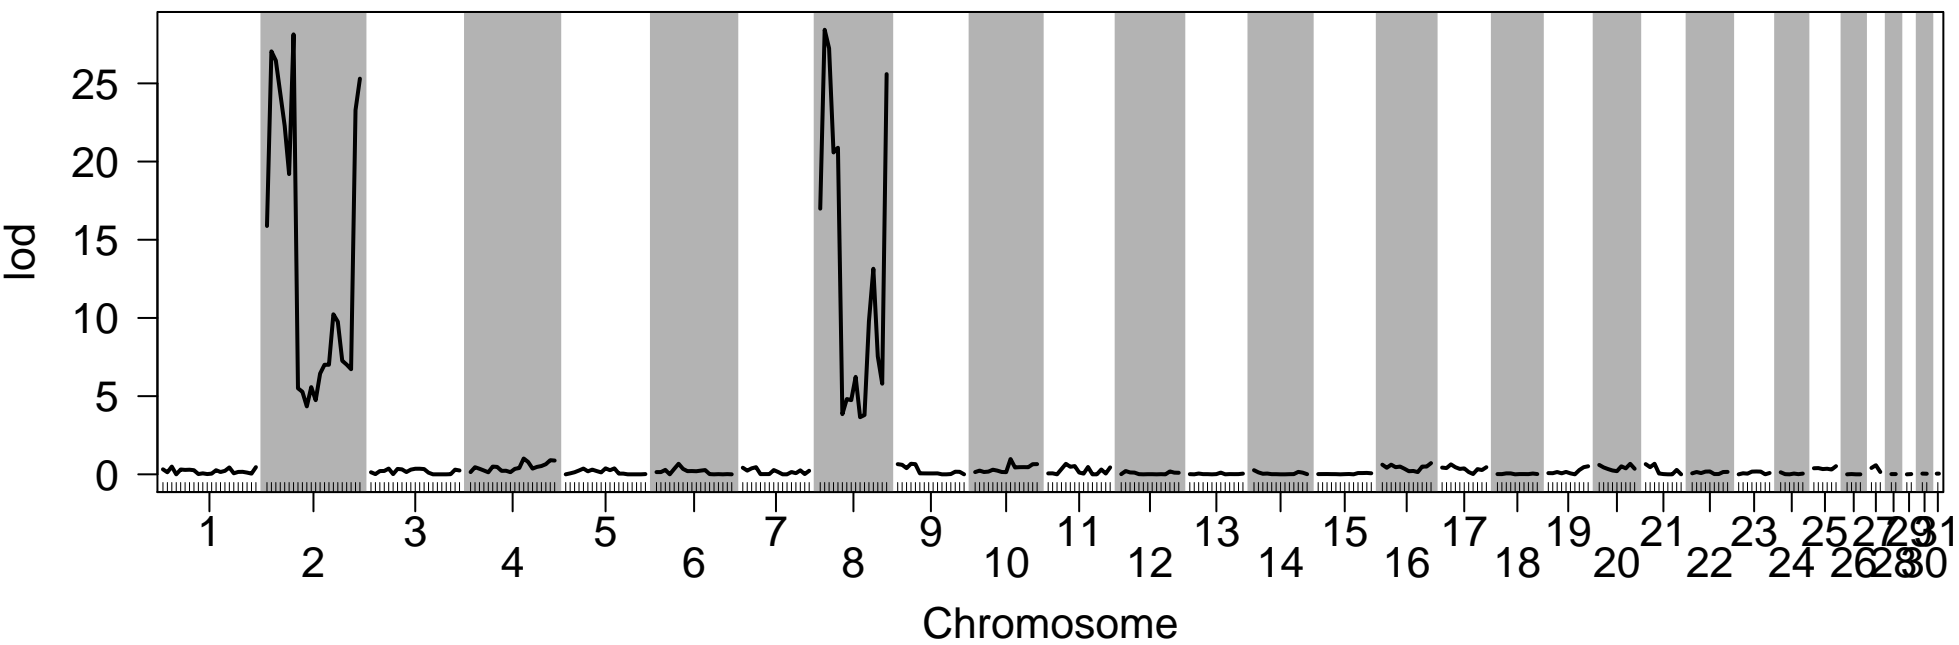

Supplement: 033092_figures2.pdf [file 033092_figures2.pdf]
